# Supplementary material for: The GDSL-Lipolytic Enzyme Lip1 Is Required for Full Virulence of the Cucurbit Pathogenic Bacterium Acidovorax citrulli
Source: MDPI journal article supplement (doi:10.3390/microorganisms10051016), 2022-05-12
Supplement: s1 [file s1]

# The GDSL-lipolytic enzyme Lip1 is required for full virulence of the cucurbit pathogenic bacterium *Acidovorax citrulli*

Tally Rosenberg, Irene Jiménez-Guerrero, Dafna Tamir-Ariel, Tali Yarnitzky and Saul Burdman

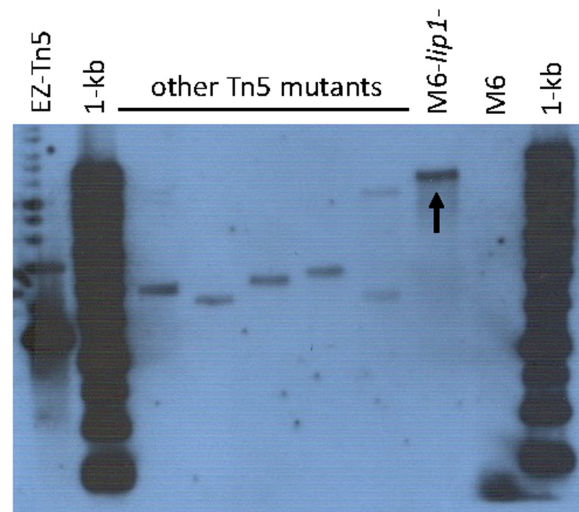

**Figure S1.** Southern blot analysis for verification of the insertion of the EZ-Tn5 cassette in the chromosome of *Acidovorax citrulli* M6-*lip1*<sup>-</sup>. Hybridization was done with the ECL Direct Nucleotide Detection System (Amersham Biosciences) according to manufacturers' instructions, and using a labeled probe corresponding to the EZ-Tn5 cassette, as described [1]. Lanes from left to right: EZ-Tn5 DNA (positive control), 1-kb ladder, five (different) Tn5 mutants, M6-*lip1*<sup>-</sup>, wild-type M6 (negative control), 1-kb ladder. The black arrow indicates a single detection of the EZ-Tn5 cassette in the M6-*lip1*<sup>-</sup> mutant (which was further confirmed by whole genome sequencing).

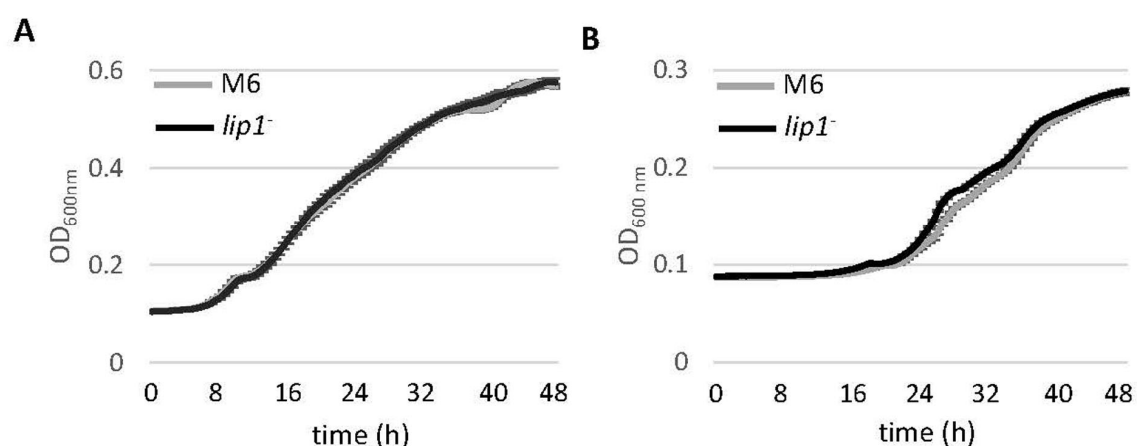

**Figure S2.** Growth curves of *A. citrulli* M6 and *lip1*<sup>-</sup> mutant in rich and in minimal media. The strains were grown for 48 h in rich [nutrient broth, NB; (A)] or minimal [XVM2 (B)] at 28 °C in an Infinite F200 plate reader (Tecan), with linear shaking for 15 s every 30 min. Results are from one representative experiment (24 replicates per strain), out of three with similar results.

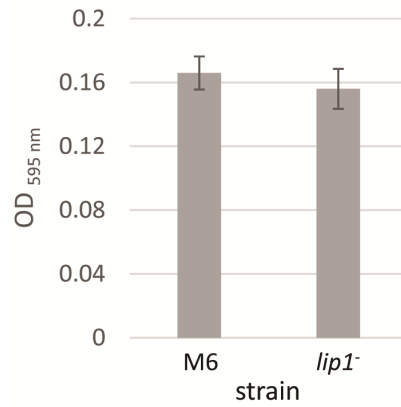

**Figure S3.** Quantification of biofilm formation of *A. citrulli* strains M6 and *lip1*<sup>-</sup> mutant. Cultures were grown in XVM2 medium for 48 h in 96-well polystyrene plates at 28 °C. Biofilm formed at the medium-air interface were stained using 0.1% crystal violet. Stained biofilms were resuspended in ethanol and quantitatively estimated by optical density measurements at OD<sub>595 nm</sub>. Data represent averages and standard errors of one experiment (10 replicates per treatment) out of three with similar results. No significant differences were found between the two strains by Tukey-Kramer test.

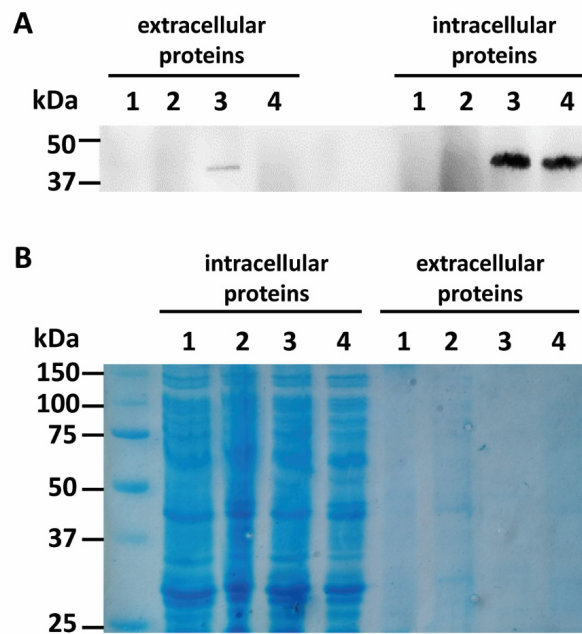

**Figure S4.** Type II secretion of Lip1. Original images of Western blot (**A**) and SDS-PAGE Coomassie staining (**B**) of extracellular and intracellular fractions of *A. citrulli* strains used for generation of Figure 8A in the manuscript. Experimental details are described in Materials and Methods. Strains: 1, wild type AAC00-1; 2, AAC00-1-T2SS<sup>-</sup> (T2S mutant); 3, AAC00-1-lip1-HA (AAC00-1 expressing HA-tagged Lip1); and 4, AAC00-1-T2SS<sup>-</sup>-lip1-HA (AAC00-1-T2SS<sup>-</sup> expressing HA-tagged Lip1).

**Table S1.** Sets of PCR primers used in this study.

| Primers *    | Primer sequence (5'-3')                                           | Purpose and size of the amplified product                                                                                                                                                                                             |
|--------------|-------------------------------------------------------------------|---------------------------------------------------------------------------------------------------------------------------------------------------------------------------------------------------------------------------------------|
| lipComp_F    | CGTAATACGACTCACTATAGGGCG<br>AATTGTAGTTGATGCCGCCGTGA<br>ATGCG      | Amplification of the <i>lip1</i> open reading frame (ORF) and its 250-bp upstream region carrying the <i>lip1-ompW</i> promoter (size: 1402 bp); used for construction of plasmid pBBRlip1 (see Table 1 and Materials and Methods).   |
| lipComp_R    | CCCTCACTAAAGGGAACAAAAGCT<br>GGATGCTTGCGGCCTGCGGCGGT               |                                                                                                                                                                                                                                       |
| ompWComp_F   | ATGGCGAACACTCCTATCCGCATC<br>AGAACCGGTAGCCGAT                      | Amplification of the <i>ompW</i> ORF (size: 693 bp) for replacement of the <i>lip1</i> ORF in pBBRlip1, resulting in plasmid pBBRompW (see Table 1 and Materials and Methods).                                                        |
| ompWComp_R   | CCCTCACTAAAGGGAACAAAAGCT<br>GAATGGCTCGATTCTCTCTTTC                |                                                                                                                                                                                                                                       |
| lip1_F       | ATCCTTGATCTGCTGGGTGA                                              | Amplification of an internal part of <i>lip1</i> (size: 153 bp); used for amplification of cDNA (target 3 in Fig. 3A).                                                                                                                |
| lip1_R       | AATTACAGCCAGACGCTGTG                                              |                                                                                                                                                                                                                                       |
| 21between_F  | CCCAGTTGTCGGTCACCAT                                               | Amplification of a region spanning the <i>lip1</i> and <i>ompW</i> ORFs and their intergenic region (size: 109 bp); used for amplification of cDNA (target 2 in Fig. 3A).                                                             |
| 21between_R  | GTCAAGAGCGGCAACCTGT                                               |                                                                                                                                                                                                                                       |
| ompW_F       | TCGTTGATGTTCCAGACGAA                                              | Amplification of an internal part of <i>ompW</i> (size: 147 bp); used for amplification of cDNA (target 1 in Fig. 3A).                                                                                                                |
| ompW_R       | CGTGACCTACGCCAAGTTCT                                              |                                                                                                                                                                                                                                       |
| lip1HA_F     | ATAGAATTCATGATCTCTAAAACC<br>ATCTA                                 | Amplification of the <i>lip1</i> ORF fused to the HA epitope sequence (size: 1179 bp); used for the generation of plasmid pBBRlip1-HA (see Table 1 and Materials and Methods).                                                        |
| lip1HA_R     | ATAGGATCCTCAAGCGTAATCTGG<br>AACATCGTATGGGTAGAGCCAGCC<br>CGCCTGGGC |                                                                                                                                                                                                                                       |
| lip1HAwoNt_F | ATAGAATTCATGGCGCGGGTGA<br>TCCGTG                                  | Amplification of the <i>lip1</i> ORF without the signal peptide sequence fused to the HA epitope sequence (size: 1080 bp); used for the generation of plasmid pBBRlip1 <sub>35-383</sub> -HA (see Table 1 and Materials and Methods). |
| lip1HA_R     | ATAGGATCCTCAAGCGTAATCTGG<br>AACATCGTATGGGTAGAGCCAGCC<br>CGCCTGGGC |                                                                                                                                                                                                                                       |

\* F, forward; R, reverse.

**References**

1. Bahar, O.; Goffer, T.; Burdman, S. Type IV pili are required for virulence, twitching motility, and biofilm formation of *Acidovorax avenae* subsp. *citrulli*. *Mol. Plant-Microbe Interact.* **2009**, *22*, 909-920, doi:10.1094/mpmi-22-8-0909.
